# Supplementary material
Source: HighWire-hosted journal article supplement (https://jnm.snmjournals.org/highwire/filestream/94922/field_highwire_adjunct_files/0/172221_Supplemental_Data.pdf)
Supplement: 172221_Supplemental_Data.pdf [file 172221_Supplemental_Data.pdf]

**Supplemental Table 1.** Two-compartment population analysis of TF2 pharmacokinetics.

| Parameter <sup>a</sup>   | $k_{2,1}$ (h <sup>-1</sup> ) | $k_{1,2}$ (h <sup>-1</sup> ) | $k_{el}$ (h <sup>-1</sup> ) | Volume/m <sup>2</sup><br>(L/m <sup>2</sup> ) | Vc (L) | Clearance<br>(L/h) |
|--------------------------|------------------------------|------------------------------|-----------------------------|----------------------------------------------|--------|--------------------|
| <b>Population values</b> |                              |                              |                             |                                              |        |                    |
| Estimation               | 0.051                        | 0.010                        | 0.167                       | 2.14                                         | NA     | NA                 |
| SD                       | 0.027                        | 0.004                        | 0.011                       | 0.06                                         | NA     | NA                 |
| <b>Individual values</b> |                              |                              |                             |                                              |        |                    |
| Patient 1                | 0.050                        | 0.009                        | 0.164                       | 2.19                                         | 3.52   | 0.58               |
| Patient 2                | 0.057                        | 0.012                        | 0.167                       | 2.20                                         | 4.01   | 0.67               |
| Patient 3                | 0.011                        | 0.011                        | 0.180                       | 2.16                                         | 3.89   | 0.70               |
| Patient 4                | 0.051                        | 0.010                        | 0.168                       | 2.14                                         | 2.98   | 0.50               |
| Patient 5                | 0.049                        | 0.008                        | 0.164                       | 2.07                                         | 4.01   | 0.66               |
| Patient 6                | 0.050                        | 0.009                        | 0.165                       | 2.20                                         | 3.43   | 0.57               |
| Patient 7                | 0.053                        | 0.009                        | 0.166                       | 2.25                                         | 4.73   | 0.79               |
| Patient 9                | 0.047                        | 0.012                        | 0.157                       | 2.14                                         | 4.01   | 0.63               |
| Patient 10               | 0.049                        | 0.011                        | 0.158                       | 2.079                                        | 3.47   | 0.55               |
| Patient 11               | 0.054                        | 0.010                        | 0.156                       | 2.070                                        | 4.01   | 0.63               |
| Patient 12               | 0.050                        | 0.008                        | 0.162                       | 2.070                                        | 3.71   | 0.60               |
| Patient 13               | 0.071                        | 0.015                        | 0.114                       | 2.053                                        | 3.77   | 0.43               |
| Patient 14               | 0.073                        | 0.017                        | 0.108                       | 2.197                                        | 4.30   | 0.46               |
| Patient 15               | 0.070                        | 0.012                        | 0.104                       | 1.980                                        | 3.44   | 0.36               |
| Patient 16               | 0.001                        | 0.012                        | 0.178                       | 2.153                                        | 3.95   | 0.70               |
| Mean <sup>b</sup>        | 0.049                        | 0.011                        | 0.154                       | 2.13                                         | 3.82   | 0.59               |
| SD                       | 0.020                        | 0.003                        | 0.025                       | 0.07                                         | 0.42   | 0.11               |
| CV                       | 39.9%                        | 22.9%                        | 15.9%                       | 3.4%                                         | 11.0%  | 19.5%              |

SD: Standard deviation; Vc: central compartment volume.

<sup>a</sup> The transfer rates ( $k_{2,1}$  and  $k_{1,2}$ ), the elimination rate ( $k_{el}$ ) and the central compartment volume per body surface area unit (Volume/m<sup>2</sup>) were adjusted to a two compartment model. Estimations of the population parameters are given together with the software estimated SD. The central compartment volume was a dependent parameter ( $Vc = \text{Volume/m}^2 \times \text{patient body surface area}$ ) as well as clearance ( $\text{Clearance} = Vc \times k_{el}$ ). <sup>b</sup>: the mean, SD and CV for each parameter were calculated from individual estimations. Note the low inter-individual variability and the lower CV of the adjusted Volume/m<sup>2</sup> compared to that of the actual central compartment volumes (Vc).

**Supplemental Table 2.** Two-compartment population analysis of IMP288 pharmacokinetics.

| Parameter <sup>a</sup>   | $k_{2,1}$ (h <sup>-1</sup> ) | $k_{1,2}$ (h <sup>-1</sup> ) | $A_s$ | $B_s$ | MR   | $k_{el}$ (h <sup>-1</sup> ) | Volume/m <sup>2</sup><br>(L/m <sup>2</sup> ) | Vc (L) | Clearance<br>(L/h) |
|--------------------------|------------------------------|------------------------------|-------|-------|------|-----------------------------|----------------------------------------------|--------|--------------------|
| <b>Population values</b> |                              |                              |       |       |      |                             |                                              |        |                    |
| Estimation               | 2.92                         | 1.77                         | 0.62  | 0.71  | NA   | NA                          | 2.84                                         | NA     | NA                 |
| SD                       | 0.78                         | 0.65                         | 0.10  | 0.06  | NA   | NA                          | 0.22                                         | NA     | NA                 |
| <b>Individual values</b> |                              |                              |       |       |      |                             |                                              |        |                    |
| Patient 1                | 3.19                         | 1.16                         | 0.62  | 0.71  | 2.5  | 0.27                        | 2.72                                         | 4.38   | 1.19               |
| Patient 2                | 3.00                         | 1.80                         | 0.64  | 0.72  | 2.5  | 0.24                        | 2.88                                         | 5.25   | 1.24               |
| Patient 3                | 2.77                         | 2.29                         | 0.67  | 0.73  | 4.6  | 0.38                        | 3.04                                         | 5.48   | 2.06               |
| Patient 4                | 2.99                         | 2.13                         | 0.54  | 0.69  | 4.7  | 0.38                        | 2.97                                         | 4.13   | 1.55               |
| Patient 5                | 2.52                         | 1.99                         | 0.71  | 0.75  | 4.3  | 0.38                        | 2.91                                         | 5.62   | 2.14               |
| Patient 6                | 2.58                         | 2.02                         | 0.70  | 0.75  | 6.2  | 0.62                        | 2.82                                         | 4.40   | 2.74               |
| Patient 7                | 2.71                         | 2.26                         | 0.54  | 0.67  | 13.3 | 0.50                        | 2.86                                         | 6.03   | 3.02               |
| Patient 9                | 2.90                         | 2.38                         | 0.56  | 0.68  | 11.0 | 0.50                        | 3.05                                         | 5.70   | 2.83               |
| Patient 10               | 3.33                         | 2.07                         | 0.41  | 0.63  | 12.7 | 0.39                        | 3.07                                         | 5.13   | 1.99               |
| Patient 11               | 2.64                         | 1.61                         | 0.68  | 0.73  | 2.4  | 0.24                        | 2.77                                         | 5.35   | 1.31               |
| Patient 12               | 2.59                         | 1.37                         | 0.70  | 0.73  | 2.4  | 0.28                        | 2.66                                         | 4.77   | 1.34               |
| Patient 13               | 2.72                         | 1.04                         | 0.65  | 0.71  | 0.7  | 0.11                        | 2.51                                         | 4.61   | 0.51               |
| Patient 14               | 3.22                         | 1.12                         | 0.60  | 0.71  | 0.9  | 0.10                        | 2.79                                         | 5.47   | 0.54               |
| Patient 15               | 2.35                         | 0.93                         | 0.70  | 0.71  | 1.0  | 0.17                        | 2.42                                         | 4.20   | 0.70               |
| Patient 16               | 2.25                         | 2.58                         | 0.66  | 0.74  | 16.5 | 0.97                        | 3.01                                         | 5.53   | 5.36               |
| Mean <sup>b</sup>        | 2.78                         | 1.78                         | 0.63  | 0.71  |      | 0.37                        | 2.83                                         | 5.07   | 1.90               |
| SD                       | 0.32                         | 0.54                         | 0.08  | 0.03  |      | 0.22                        | 0.19                                         | 0.61   | 1.25               |
| CV                       | 11.4%                        | 30.3%                        | 13.5% | 4.8%  |      | 60.3%                       | 6.9%                                         | 12.0%  | 65.6%              |

<sup>a</sup> The transfer rates ( $k_{2,1}$  and  $k_{1,2}$ ), the central compartment volume per body surface area unit (m<sup>2</sup>) and the two parameters  $A_s$  and  $B_s$  were adjusted using a two compartment model. Estimations of the population parameters are given together with the software estimated SD. The central compartment volume was a dependent parameter ( $V_c = \text{Volume}/m^2 \times \text{patient body surface area}$ ). Clearance was calculated as  $A_s \times MR^{B_s}$ , MR being the ratio of the number of moles of injected IMP288 to the number of moles of TF2 present in the circulation at the time of IMP288 injection and the elimination constant  $k_{el}$  as  $\text{Clearance}/V_c$ . <sup>b</sup>: the mean, SD and CV for each parameters were calculated from individual estimations
